# Supplementary material for: Group Contribution Revisited: The Enthalpy of Formation of Organic Compounds with “Chemical Accuracy” Part III
Source: MDPI journal article supplement (doi:10.3390/appliedchem2040015), 2022-11-11
Supplement: s1 [file s1]

**Table S1.** Quantum mechanics B3LYP calculated total energies (hartree) and relative energies (kJ/mol) for fluorinated alkanes.

| B3LYP//6-311+G**          | Total Energy (hartree) | Relative Energy (kJ/mol) |
|---------------------------|------------------------|--------------------------|
| 1,1-difluoroethane        | -278.416924            | 0                        |
| 1,2-difluoroethane        | -278.396916            | 53                       |
| 1,1-difluoropropane       | -317.743564            | 0                        |
| 1,2-difluoropropane       | -317.731709            | 31                       |
| 1,1-difluorohexane        | -435.700378            | 0                        |
| 1,2-difluorohexane        | -435.689045            | 30                       |
| 2,2-difluorohexane        | -435.709362            | -24                      |
| 3,3-difluorohexane        | -435.708695            | -22                      |
| 2,4-difluorohexane        | -435.701172            | -2                       |
| 2,5-difluorohexane        | -435.701172            | -2                       |
| 1,1-difluorooctane        | -514.34905             | 0                        |
| 1,2-difluorooctane        | -514.337696            | 30                       |
| 3,6-difluorooctane        | -514.349403            | -3                       |
| 2,6-difluorooctane        | -514.348424            | 0                        |
| 3,3-difluorooctane        | -514.35745             | -21                      |
| 1,8-difluorooctane        | -514.33608             | 32                       |
| 2,7-difluorooctane        | -514.349478            | -3                       |
| 2,3-difluorooctane        | -514.344901            | 9                        |
| 1,1-difluorononane        | -553.673394            | 0                        |
| 1,2-difluorononane        | -553.662032            | 30                       |
| 2,2-difluorononane        | -553.682369            | -24                      |
| 3,3-difluorononane        | -553.681789            | -22                      |
| 2,2,7,7 tetrafluorooctane | -712.913327            | 0                        |
| 4,4,5,5 tetrafluorooctane | -712.899682            | 36                       |
| 2,2,8,8-tetrafluorononane | -752.237282            | 0                        |
| 4,4,5,5 tetrafluorononane | -752.22417             | 34                       |
| 1,1,9,9 tetrafluorononane | -752.218726            | 49                       |
| 1,1,2,2 tetrafluorononane | -752.214191            | 61                       |
| 2,4,6,8 tetrafluorononane | -752.218128            | 50                       |
